# Supplementary material for: MITgcm-RN v1.0: modeling the transport and fate of radionuclides released from nuclear power plants wastewater in the global ocean using MITgcm_c65i with the radionuclide module
Source: Copernicus journal article supplement (doi:10.5194/gmd-18-10169-2025), 2025-12-18
Supplement: Supplementary file 1 [file gmd-18-10169-2025-supplement.pdf]

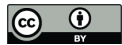

*Supplement of*

**MITgcm-RN v1.0: modeling the transport and fate of radionuclides released from nuclear power plants wastewater in the global ocean using MITgcm\_c65i with the radionuclide module**

**Mao Mao et al.**

*Correspondence to:* Yujuan Wang (yj.wang@nuist.edu.cn) and Yanxu Zhang (yzhang127@tulane.edu)

The copyright of individual parts of the supplement might differ from the article licence.

## Dissolved(Low-end estimate)

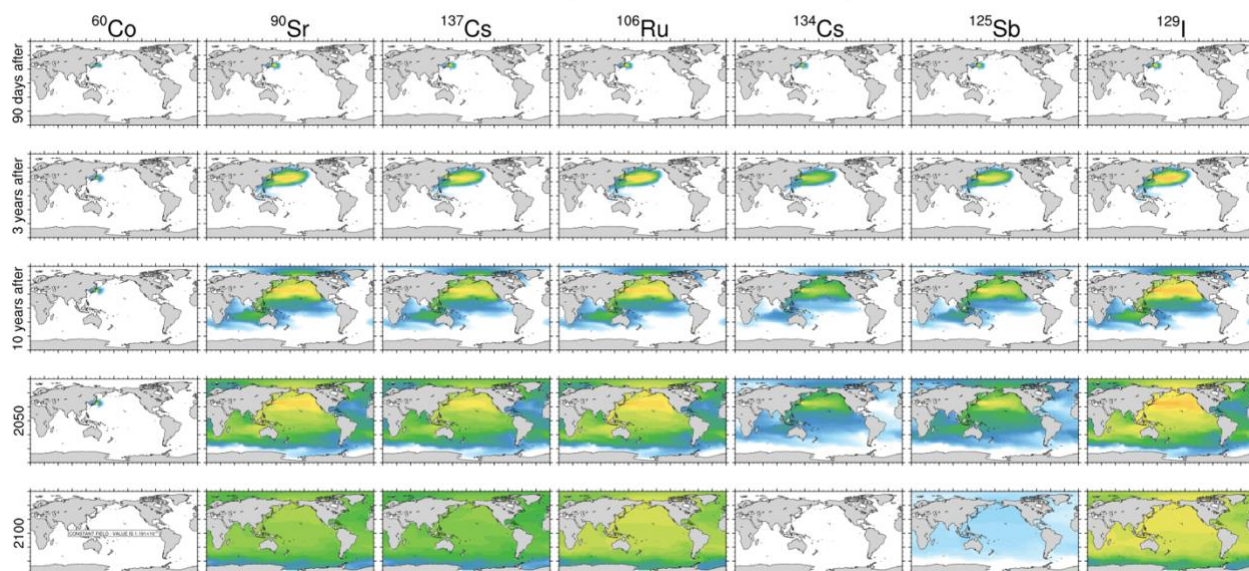

## Dissolved(Intermediate estimate)

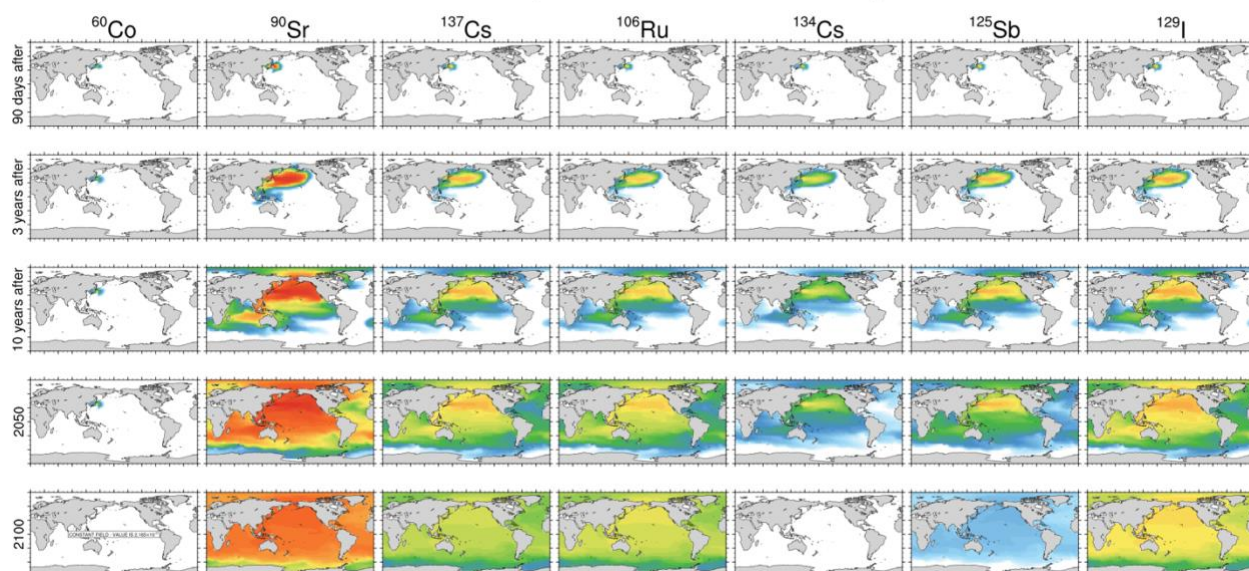

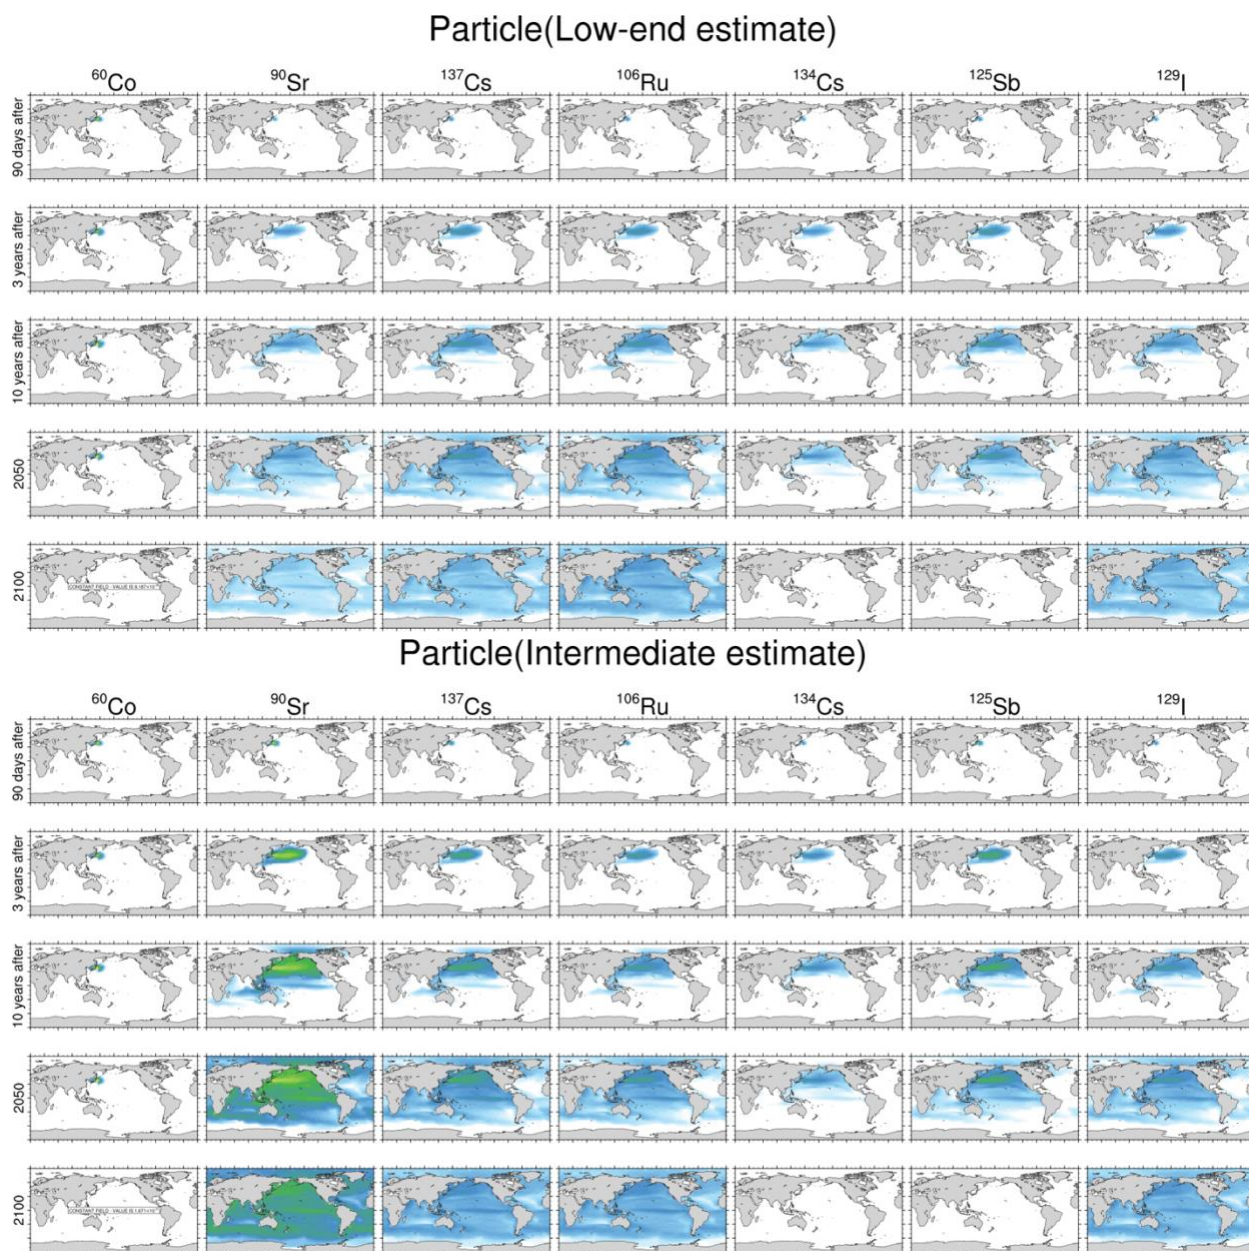

Figure S1. Projected spatial distribution of dissolved and particulate primary radionuclides in the seawater in the 21<sup>st</sup> century ocean under three scenarios.



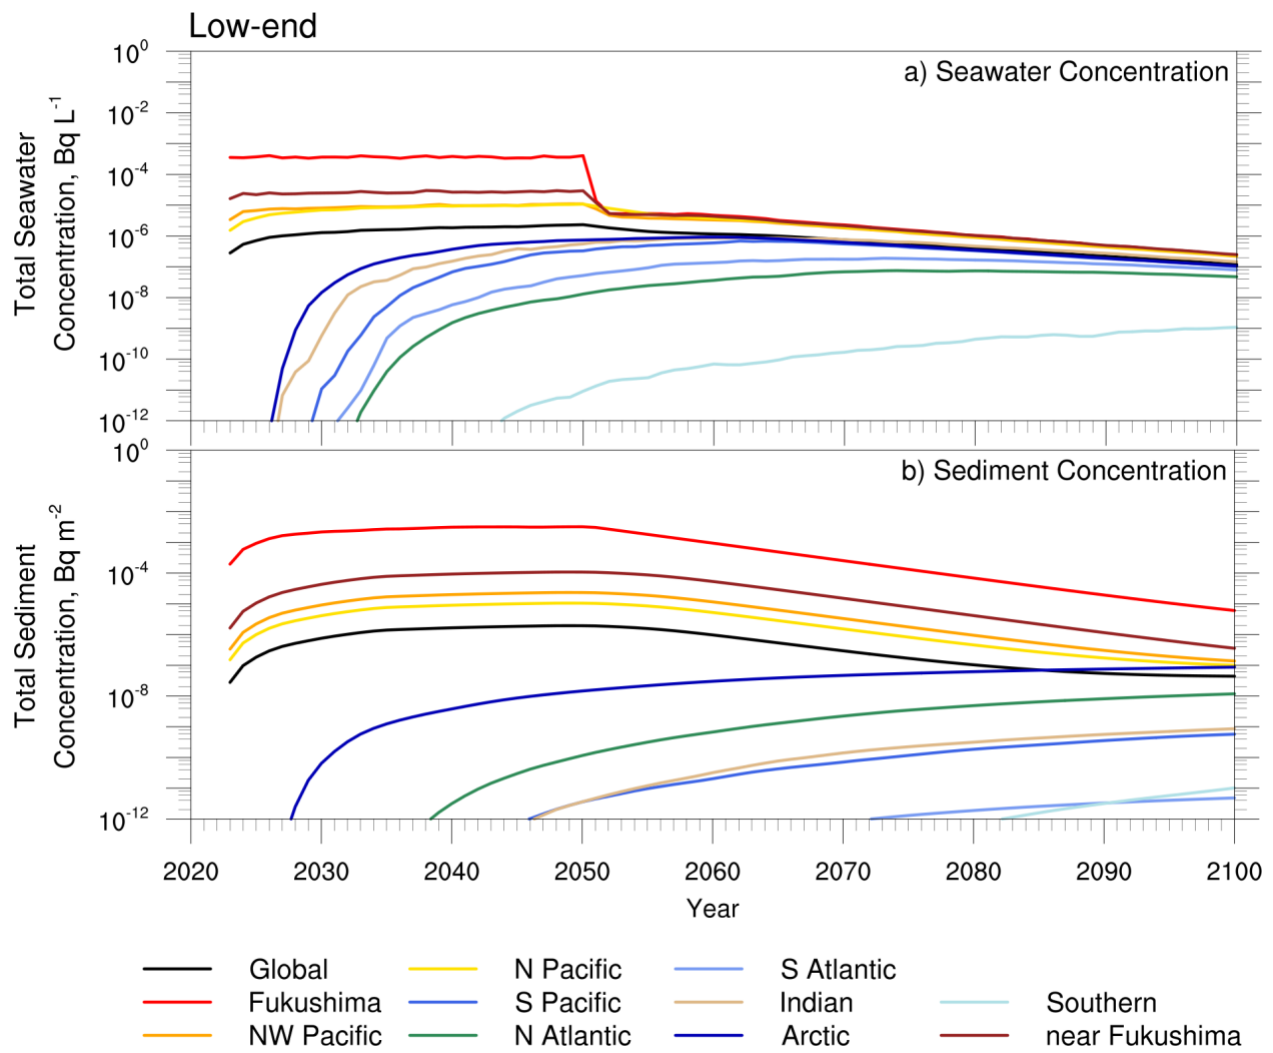

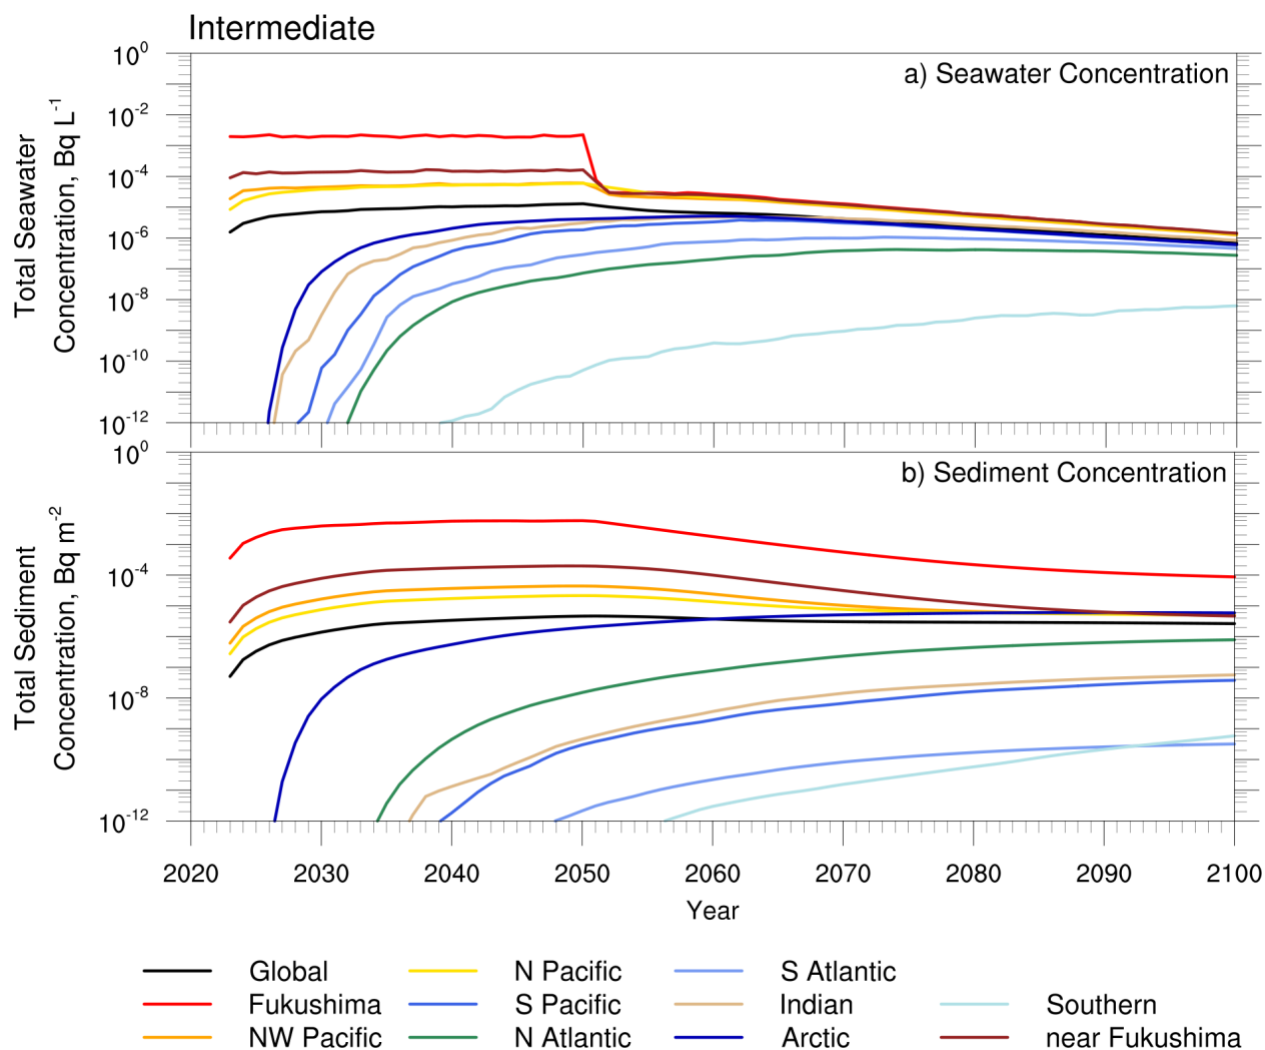

Figure S2. Projected total radionuclide a) concentrations and b) sedimentation fluxes over different ocean basins for low-end and intermedia scenarios.

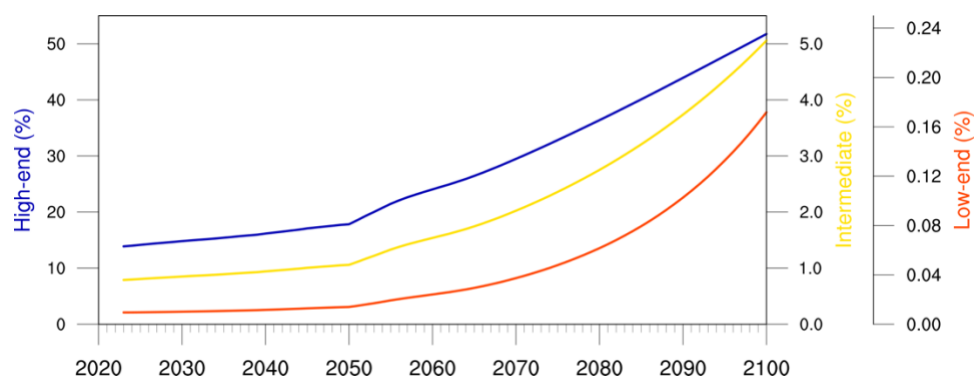

Figure S3. Global average fraction of primary seven nuclides over the total nuclide concentrations. Blue, yellow, and red curves are for high-, intermediate, and low-end emission scenarios, respectively. Note each with a separate y-axis.

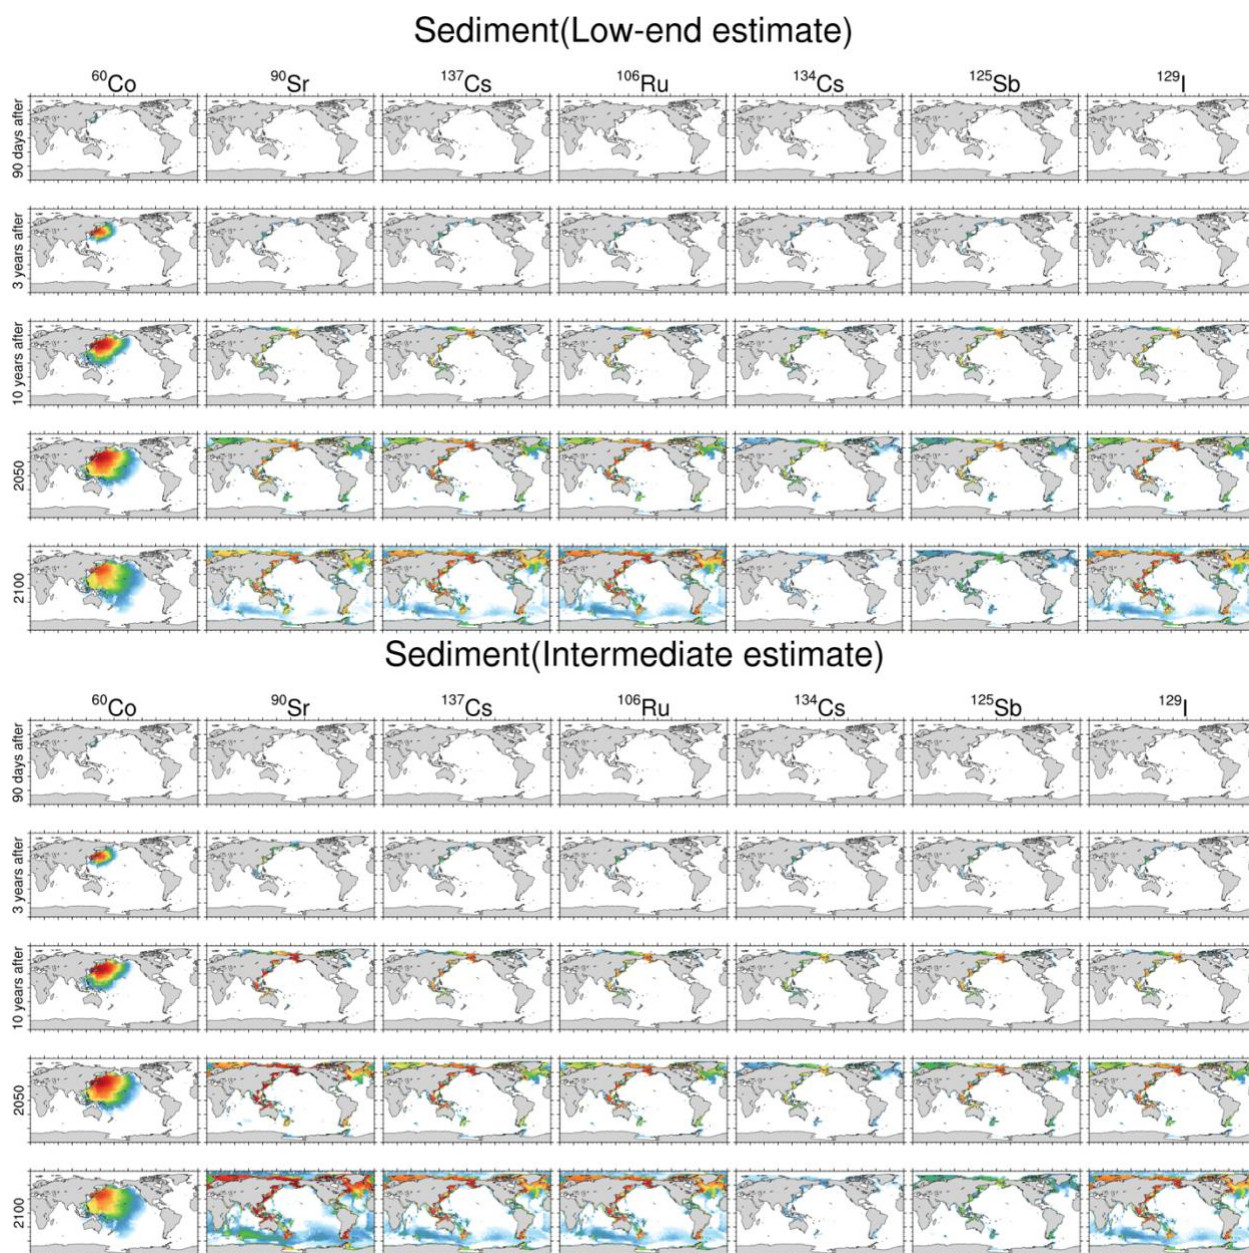

Figure S4. Projected spatial distribution of the sediment flux of primary seven radionuclides in the 21<sup>st</sup> century ocean under the low and intermedia scenarios.

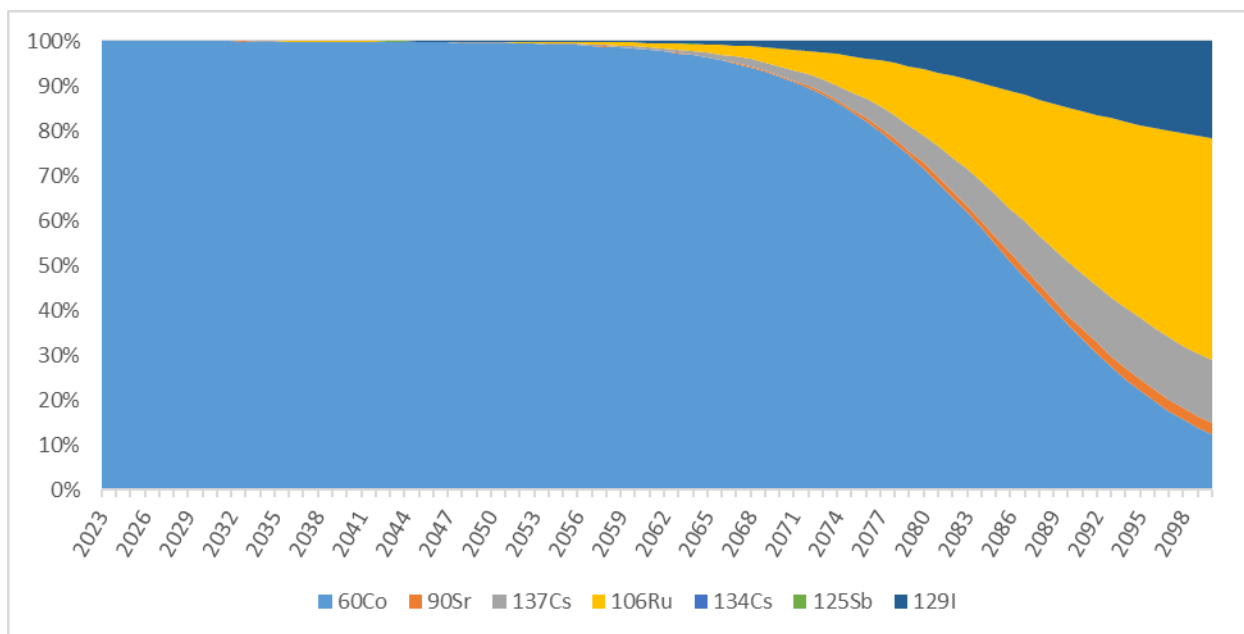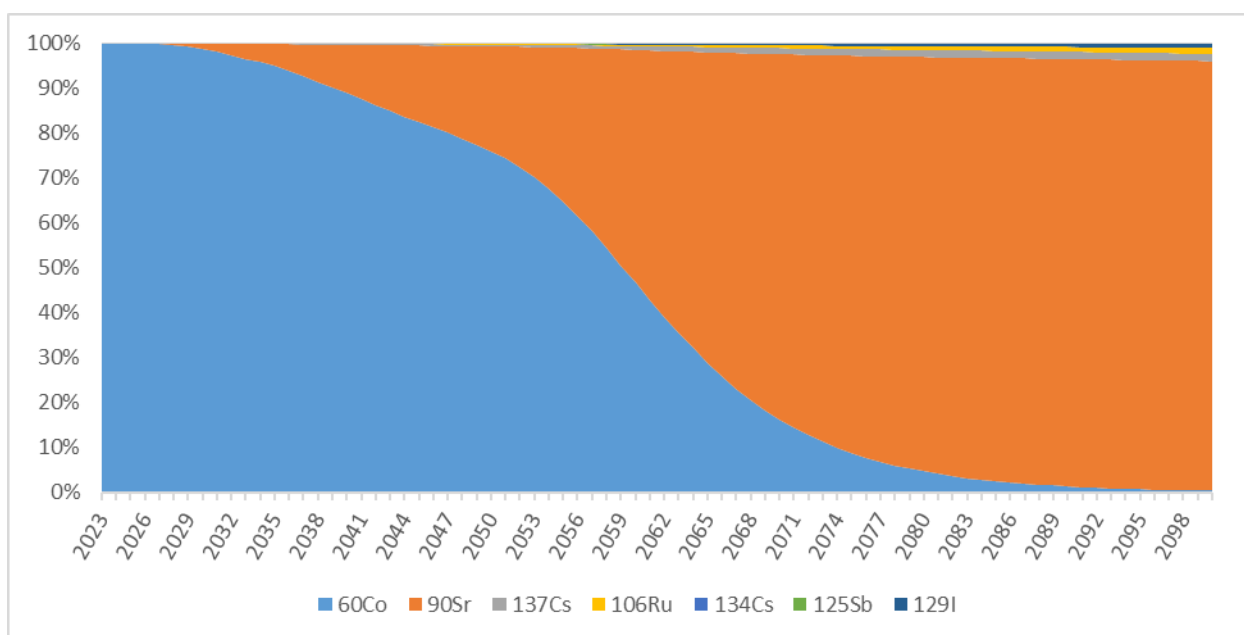



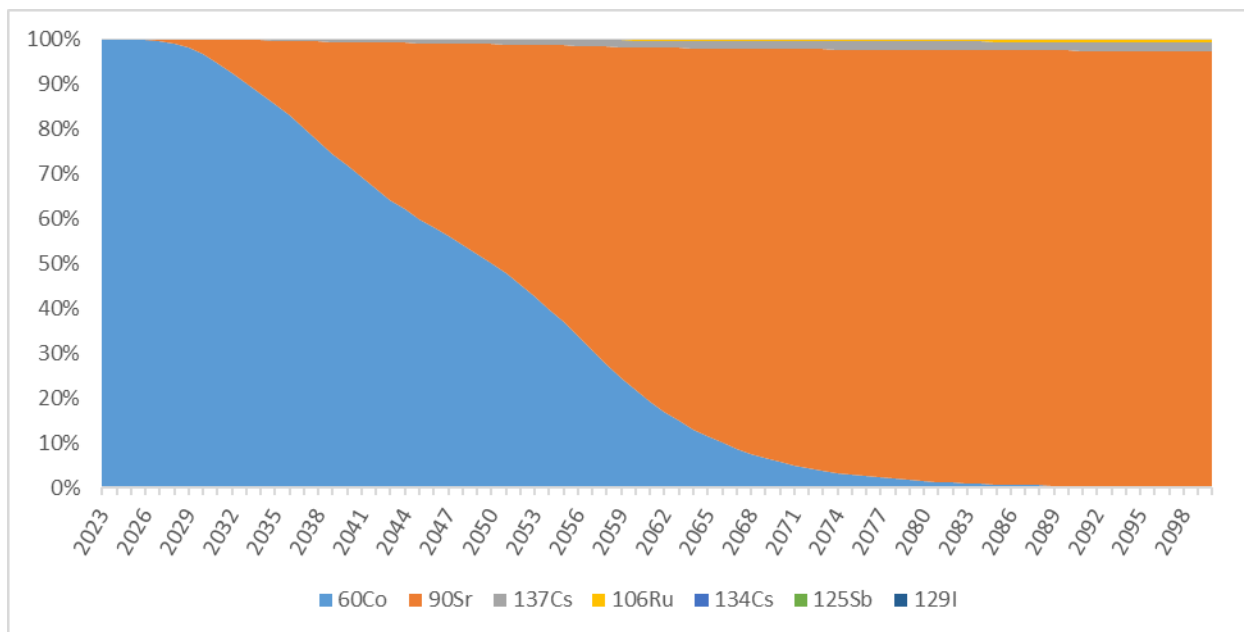

Figure S5. Relative contribution of different nuclides in the global sediments (from top to bottom are low-end scenario, intermediate scenario, and high-end scenario, respectively).

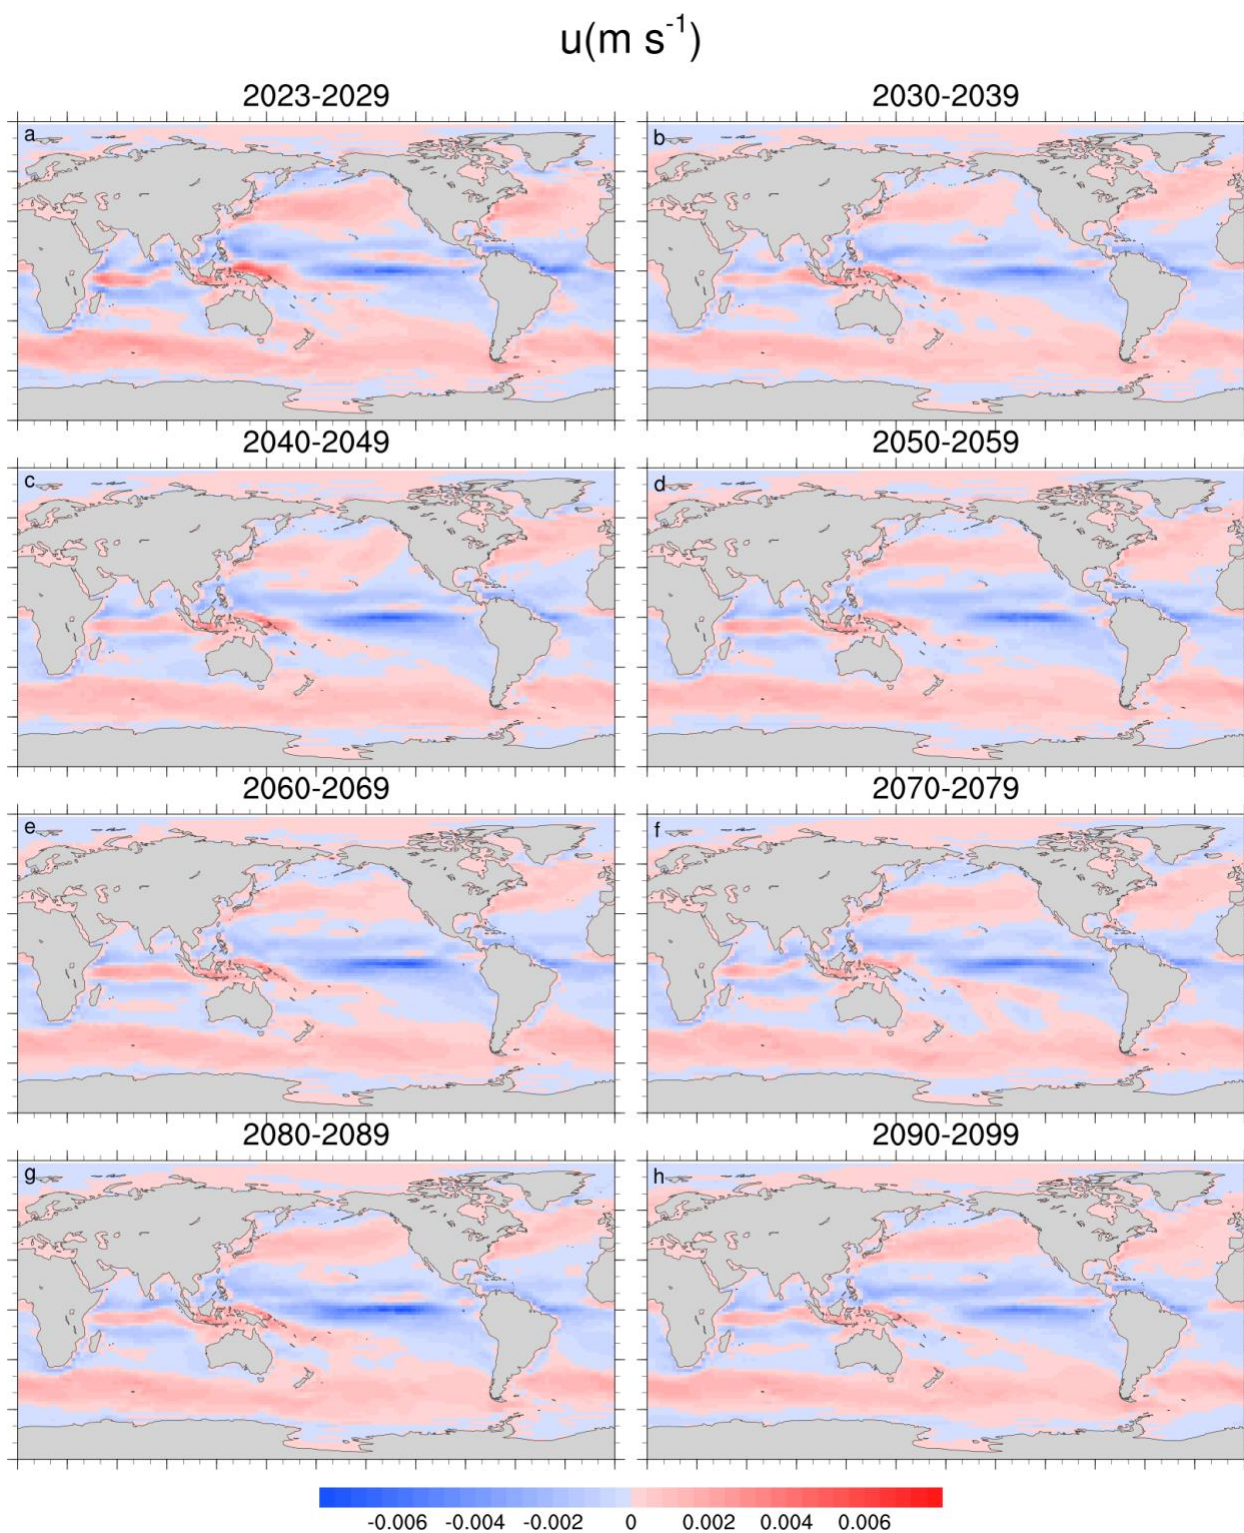

Figure S6. Surface ocean current velocities: U

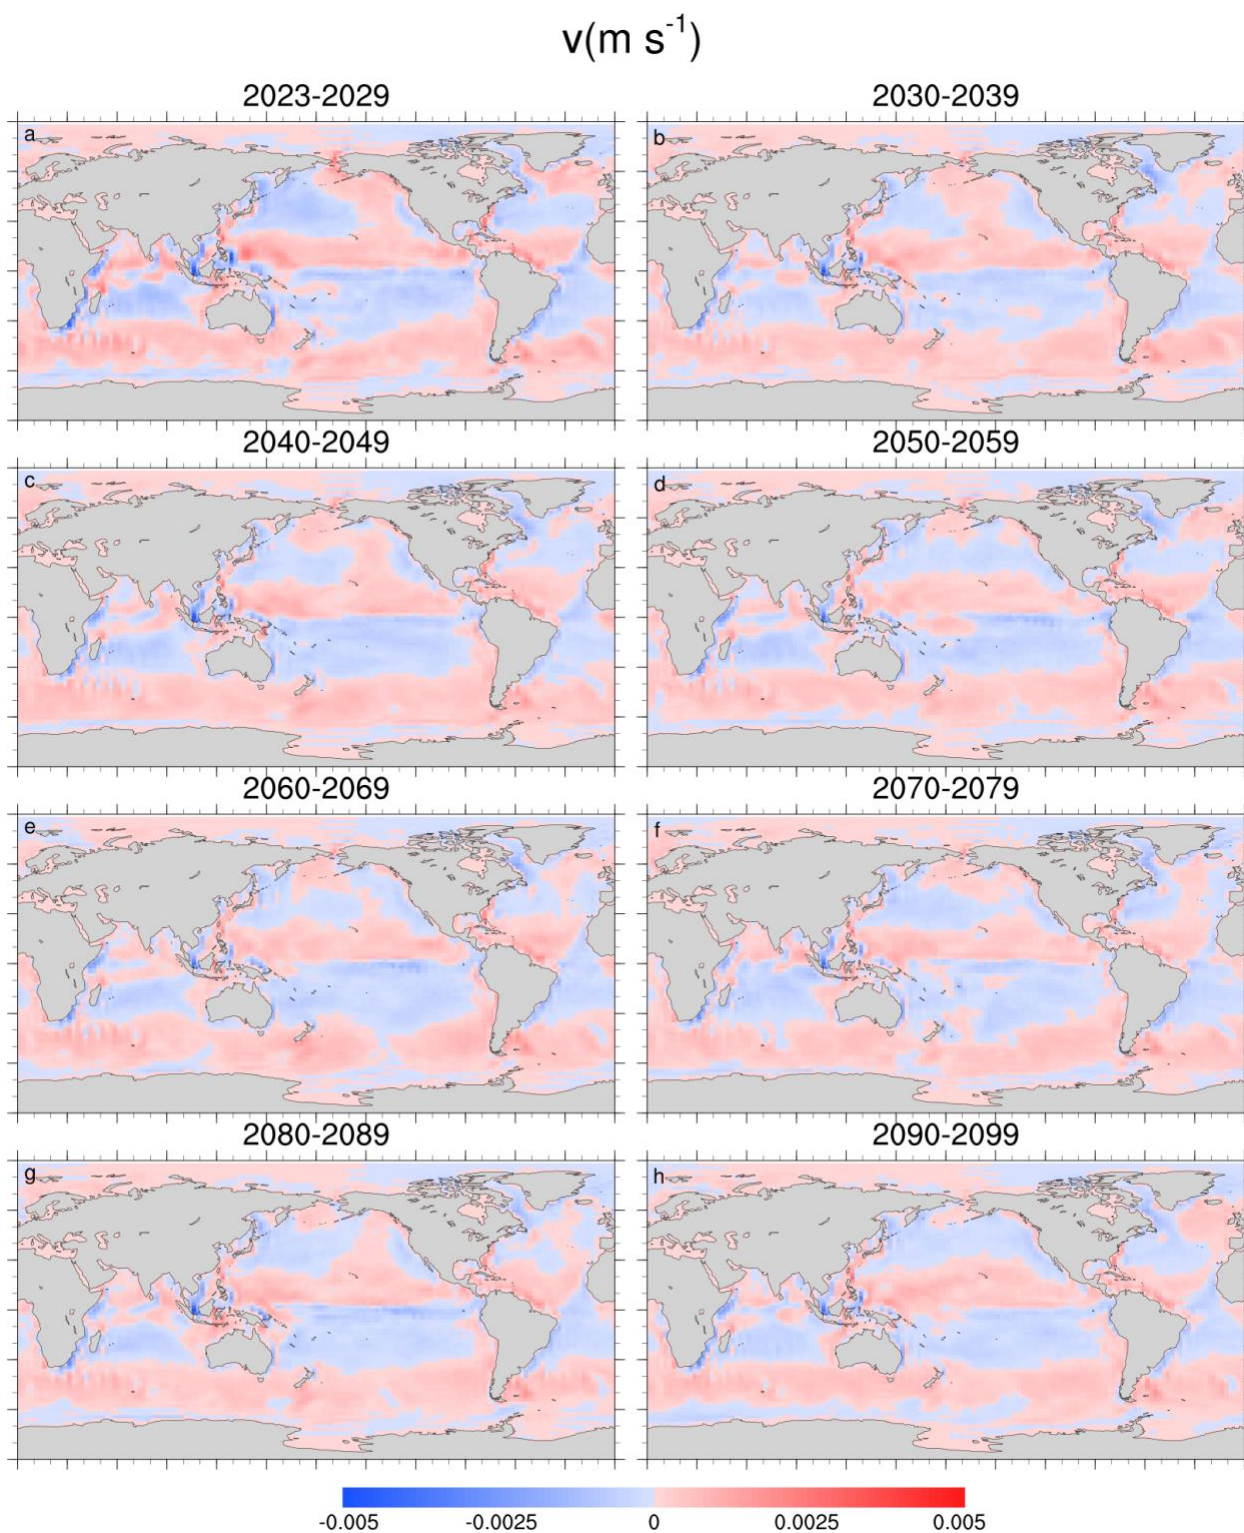

Figure S7. Surface ocean current velocities:  $V$



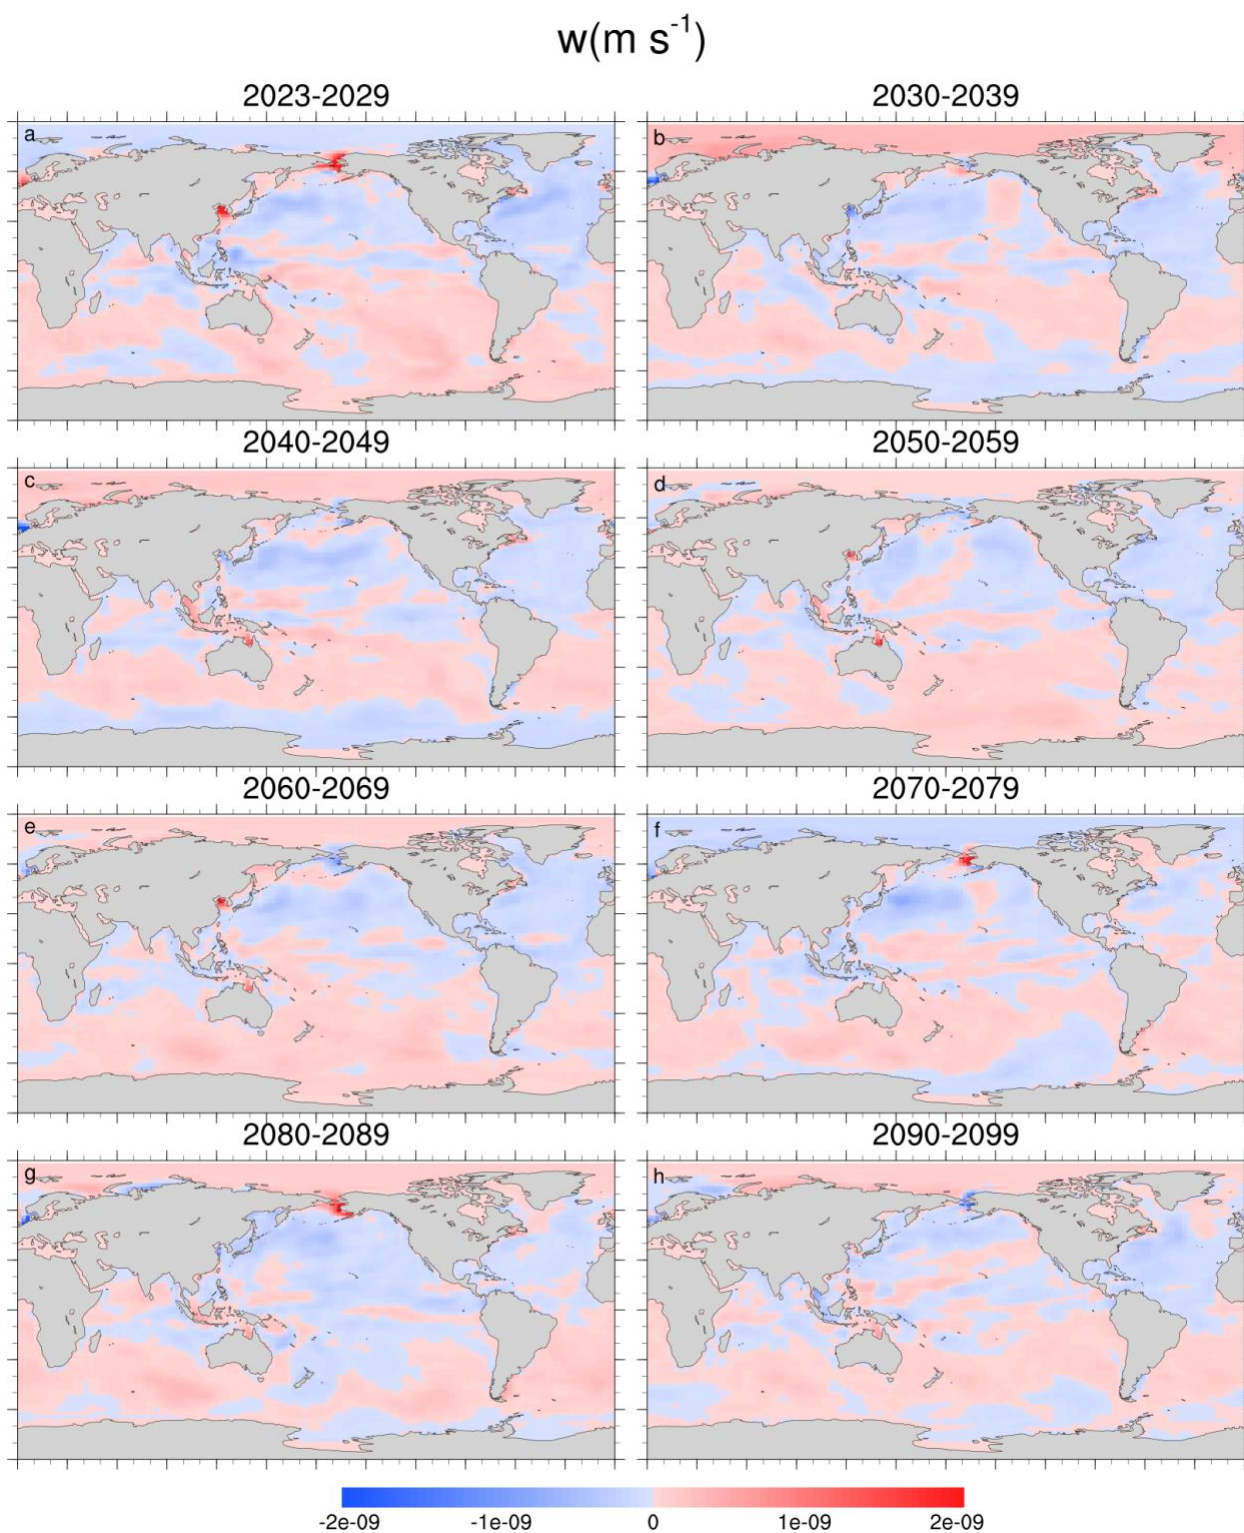

Figure S8. Surface ocean current velocities: W



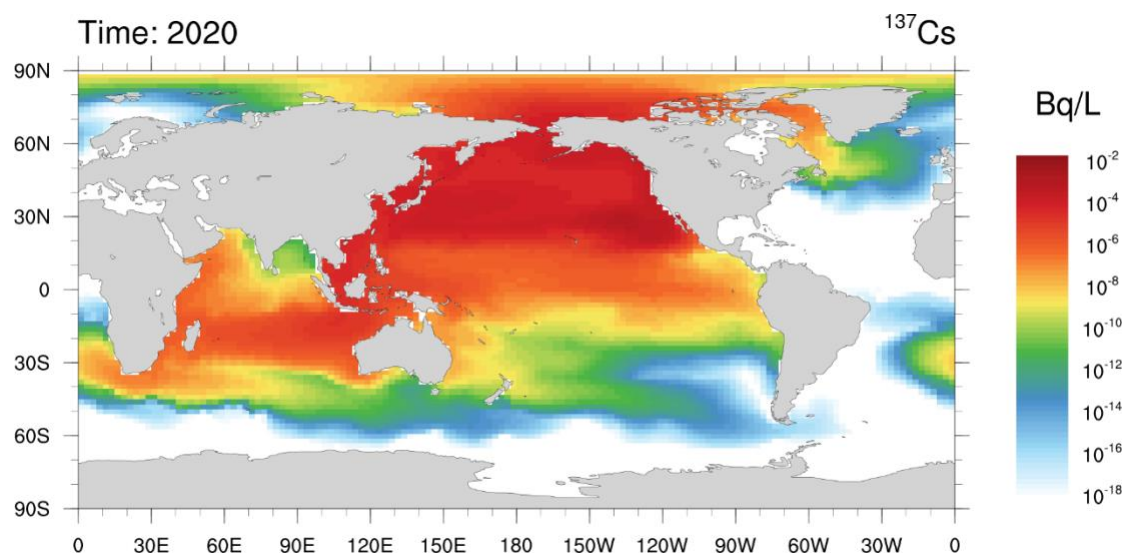

Figure S9. Global distribution of simulated  $^{137}\text{Cs}$  in 2020 from the verification scenario experiment.
